# Supplementary material
Source: PubMed Central journal article supplement (PMC6311515)
Supplement: supp_RA118.006050_141051_2_supp_225950_ph8kjy.pdf [file supp_RA118.006050_141051_2_supp_225950_ph8kjy.pdf]

# Supplementary Figure 1

**A**

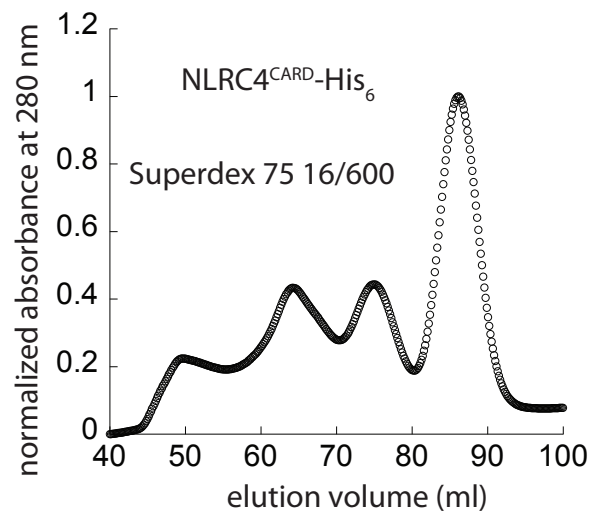

**B**

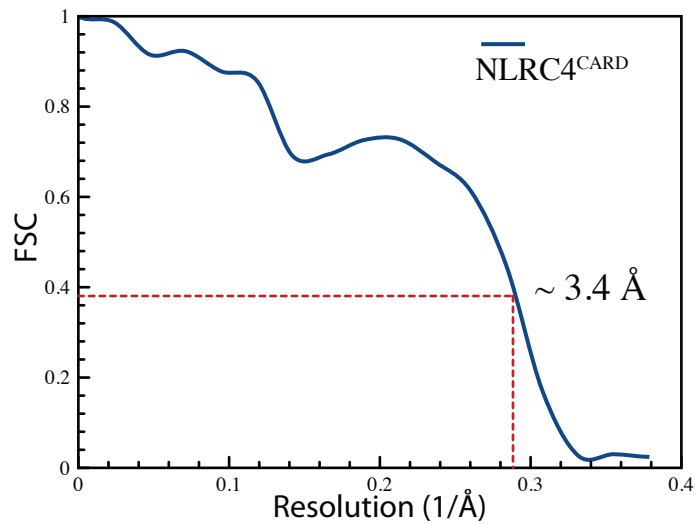

**C**

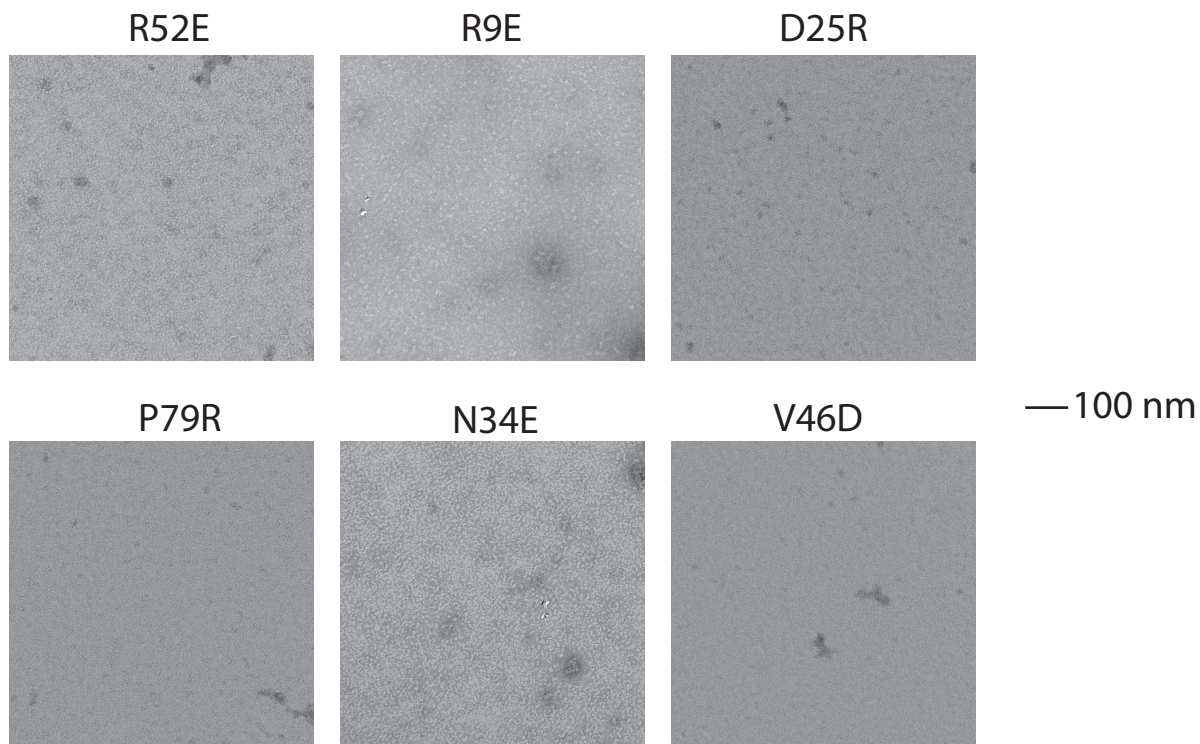

## Supplementary Figure 1

(A) SEC of NLRC4<sup>CARD</sup> constructs.

(B) A plot of model-map FSC

(C) nsEM images of MBP-NLRC4<sup>CARD</sup>-eGFP before cleaving MBP with TEVp.
